# Supplementary material for: First trimester employment, working conditions and preterm birth: a prospective population-based cohort study
Source: HighWire-hosted journal article supplement (doi:10.1136/oemed-2020-107072), 2021-02-24
Supplement: oemed-2020-107072supp001_data_supplement.pdf [file oemed-2020-107072supp001_data_supplement.pdf]

Supplementary Table 1 Working conditions as a function of demographics. Only working population included. Amsterdam Born Children and their Development study, Amsterdam, The Netherlands, 2003-2004

|                               | Total N | Smoking | Primi parae | Dutch | Overweight <sup>1</sup> | Low Education <sup>2</sup> |
|-------------------------------|---------|---------|-------------|-------|-------------------------|----------------------------|
|                               |         | %       | %           | %     | %                       | %                          |
| Weekly working hours          |         |         |             |       |                         |                            |
| 8-31                          | 1889    | 8.9     | 40.2        | 67.1  | 21.1                    | 14.2                       |
| 32-40                         | 2676    | 8.3     | 74.2        | 69.0  | 18.2                    | 9.9                        |
| > 40                          | 300     | 7.0     | 86.7        | 70.3  | 13.7                    | 5.3                        |
| Weekly standing/walking hours |         |         |             |       |                         |                            |
| <10                           | 2764    | 6.1     | 60.5        | 71.2  | 16.6                    | 7.1                        |
| 10-19                         | 1011    | 9.8     | 58.3        | 70.2  | 21.1                    | 11.2                       |
| 20-30                         | 574     | 11.3    | 66.6        | 63.1  | 23.2                    | 17.9                       |
| >30                           | 356     | 17.7    | 74.2        | 58.1  | 25.0                    | 29.2                       |
| Physical work load            |         |         |             |       |                         |                            |
| Low                           | 2606    | 5.6     | 63.5        | 74.2  | 14.8                    | 4.8                        |
| Moderate                      | 1692    | 10.3    | 61.3        | 64.3  | 22.3                    | 14.7                       |
| High                          | 502     | 17.3    | 56.8        | 56.2  | 28.3                    | 30.3                       |
| Job Strain                    |         |         |             |       |                         |                            |
| Low                           | 2170    | 7.0     | 62.3        | 72.1  | 16.6                    | 8.5                        |
| Moderate                      | 2152    | 9.2     | 63.0        | 68.0  | 19.7                    | 11.4                       |
| High                          | 316     | 13.9    | 53.2        | 54.4  | 30.1                    | 23.4                       |

Note: Sample sizes differ slightly because of missing values.

<sup>1</sup> Pre pregnancy BMI > 25 kg/m<sup>2</sup>

<sup>2</sup> < 5 years education after primary school

PTB=preterm birth

Supplementary Table 2 Mediation model with mediator PIH on the association between working condition standing/walking and PTB (N=4,684)

|                         | Standing/walking → PIH<br>Beta a-path<br>OR (95%CI) | PIH → total PTB<br>Beta b-path<br>OR (95%CI) | Mediation (Boot 95% CI)<br>indirect effect (a x b)<br>OR (95%CI) |
|-------------------------|-----------------------------------------------------|----------------------------------------------|------------------------------------------------------------------|
| Standing/walking<br>≤10 | <i>ref</i>                                          | 1.25 (0.91; 1.71)                            | <i>ref</i>                                                       |
| 11-20                   | 0.95 (0.79; 1.15)                                   |                                              | 0.99 (0.92; 1.04)                                                |
| 21-30                   | 1.01 (0.80; 1.28)                                   |                                              | 1.00 (0.93; 1.08)                                                |
| >30                     | 0.85 (0.63; 1.15)                                   |                                              | 0.96 (0.86; 1.05)                                                |
|                         | Standing/walking → PIH<br>Beta a-path               | PIH → Iatrogenic<br>PTB<br>Beta b-path       | Mediation (Boot 95% CI)<br>indirect effect (a x b)               |
| Standing/walking<br>≤10 | <i>ref</i>                                          | 5.48 (2.97; 10.12)                           | <i>ref</i>                                                       |
| 11-20                   | 0.96 (0.79; 1.17)                                   |                                              | 0.94 (0.67; 1.32)                                                |
| 21-30                   | 1.03 (0.81; 1.31)                                   |                                              | 1.05 (0.71; 1.57)                                                |
| >30                     | 0.86 (0.64; 1.18)                                   |                                              | 0.78 (0.45; 1.35)                                                |

Models adjusted for: parity, smoking, previous preterm birth, ethnicity, maternal educational level, maternal age, maternal pre-pregnancy BMI

Spontaneous PTB were excluded in the analysis of iatrogenic PTB

PTB=preterm birth

PIH=pregnancy induced hypertension
